# Supplementary material for: Non-destructive characterization using MCT reveals the composition and distribution of impurities in solar carnallite
Source: Royal Society of Chemistry journal article supplement (doi:10.1039/c5ra00989h), 2015-01-01
Supplement: c5ra00989h6.pdf [file c5ra00989h6.pdf]

11

## 12 1. Materials and methods

13 NaCl (AR, ShangHai LingFeng Chemical reagent Co.,LTD, China)

14 KCl (AR, ShangHai LingFeng Chemical reagent Co.,LTD, China)

15 MgCl<sub>2</sub>•6H<sub>2</sub>O (AR, ShangHai LingFeng Chemical reagent Co.,LTD, China)

16 CaSO<sub>4</sub>•2H<sub>2</sub>O (AR, ShangHai LingFeng Chemical reagent Co.,LTD, China)

17 Pure carnallite was crystallized in our lab. It was obtained by means of solvent evaporation. An  
18 almost saturated solution containing KCl 3.160 g , MgCl<sub>2</sub>•6H<sub>2</sub>O 56.899 g and H<sub>2</sub>O 39.968 g was

19 evaporated at 20°C, the container was covered by a polythene sheet to permit evaporation and  
20 isolate dust. After 2 weeks, pure carnallite crystals were obtained. The MCT detection parameters  
21 were: voltage 150 KV; current 0.20 mA; distance of focus and object to the detector are 850 mm and  
22 817.94 mm; distance of focus to object was 32.06 mm. CT data were reconstructed as 1024×1024  
23 16 bit grayscale images per scan. The relative density value used in manuscript was calculated  
24 according to the density is proportional to the material gray scale (G<sub>m</sub>).the formula as following:

$$\rho_R = \frac{G_m \times 1.602 \text{ g/cm}^3}{328}$$

25

## 26 2. Sample sit description

27 The Qarhan salt lake, located in Qaidam Basin, Qinghai province, northwest China, contains  
28 abundant potassium, sodium, magnesium and lithium salt deposits. The Qarhan salt lake is the most  
29 important and the largest potash fertilizer base in China. Qinghai Salt Lake Industry Group Co. Ltd  
30 is the biggest potash fertilizer production enterprise in Qarhan. The reverse flotation cold  
31 crystallization strategy was implemented to produce millions of tons potassium chloride fertilizer  
32 per year using carnallite as raw material in Qinghai Salt Lake Industry Group Co. Ltd. Taking  
33 advantage of local abundant solar and wind energy resources, carnallite was harvested by  
34 evaporating salt lake brine. The brine evaporation flow chart and the main chemical components  
35 (w%) of brine in the solar carnallite pond was shown in Fig. S1.

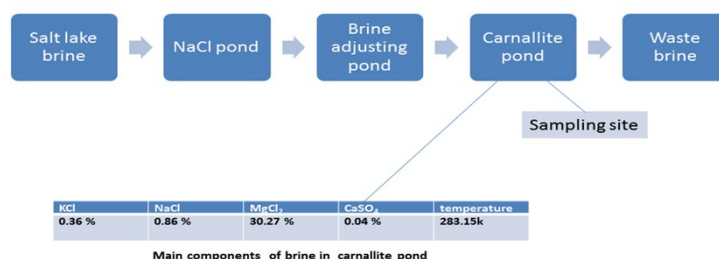

36

37

**Fig.S1 the flow chart of carnallite production**

### 39 3. The relationship between mineral density and gray scale

40 In Fig.S2, carnallite A was the pure carnallite we crystallized in our lab, Carnallite B was  
 41 the solar carnallite collected from Qarhan salt lake; The MCT data was analyzed using VG  
 42 Studio Max 2.2.

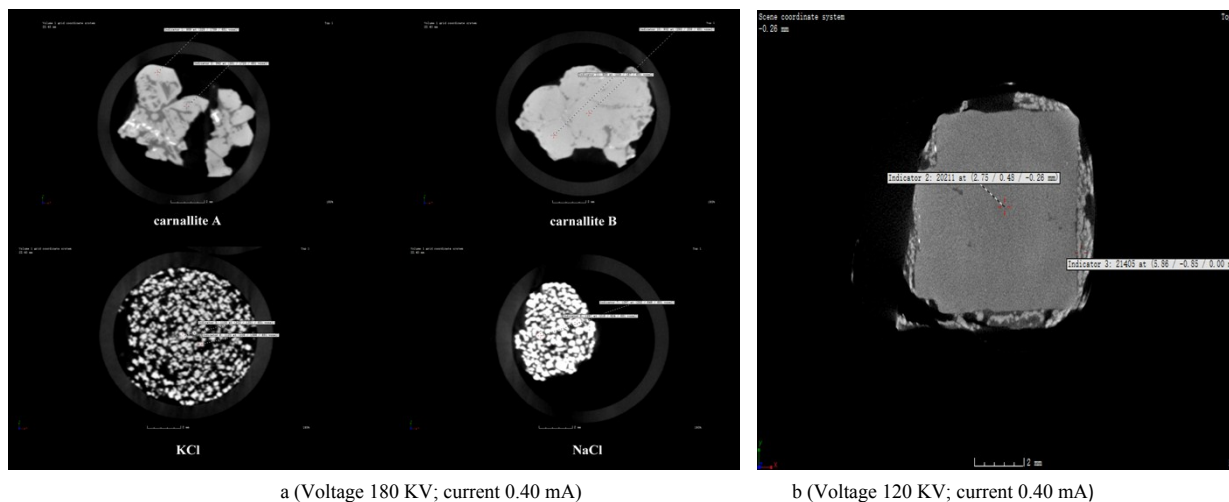

43  
 44  
 45  
 46 **Fig.S2 the relationship between image gray scale and matter densit**

47  
 48 Because of larger compact gypsum crystals were really rare and hard obtained while the  
 49 common pure gypsum particles were too fluffy to analyze by MCT. So we obtain its calibrated gray  
 50 scale value by crystallizing a layer of pure gypsum on the surface of a large pure NaCl crystal. A  
 51 pure NaCl crystal was put into NaCl saturated solution and then pure  $\text{CaSO}_4 \cdot 6\text{H}_2\text{O}$  powder were  
 52 added into until  $\text{CaSO}_4$  was over saturated, standing for 12 hours at  $20^\circ\text{C}$ . The Crystal with a  
 53 gypsum layer on its surface was scanned by MCT, and then the pure gypsum gray scale was  
 54 obtained. The gray scale value of each pure crystal and the gray scale ratio between pure crystal  
 55 with pure carnallite were provide in table 1.

56 Table 1 Gray scale value and the gray scale ratio between pure crystals with pure carnallite

| Material                           | KCl  | NaCl | $\text{CaSO}_4 \cdot 2\text{H}_2\text{O}$ | $\text{MgKCl}_3 \cdot 6\text{H}_2\text{O}$ | $\text{MgKCl}_3 \cdot 6\text{H}_2\text{O}$ (B<br>) |
|------------------------------------|------|------|-------------------------------------------|--------------------------------------------|----------------------------------------------------|
| Gray scale                         | 1114 | 1297 | 1373*                                     | 940.5                                      | 966                                                |
| G.S. ratio with<br>pure carnallite | 1.18 | 1.38 | 1.46                                      | 1.00                                       | 1.03                                               |

57

### 58 4. Impurity composition

59 We analyzed the MCT data using VG Studio Max 2.2, and 1554 impurity particles which  
 60 gray scale value was more than 330 were found in our specimen. MCT data analysis shows that  
 61 the mean gray scale value of specimen was 328. Therefore, it was defined that the specimen  
 62 gray scale was 328. The gray scale ratio of 1554 impurity particles was calculated as  $G_{(M)} / 328$   
 63 and the relationship between frequency with grayscale ratio was shown in Fig.S4

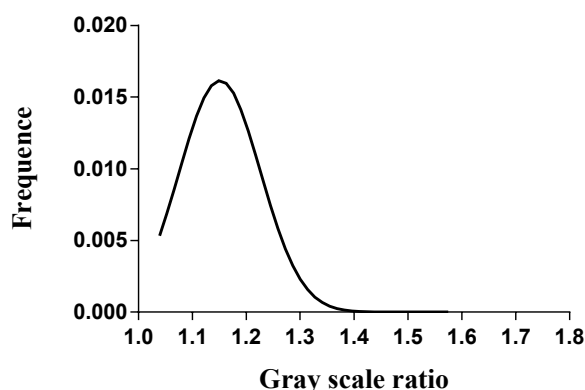

65

66

**Fig.S3 Image of impurities gray scale ratio and the presence frequency**

67 As shown in Fig.S3, the range of impurities gray scale ratio distribution is 1.1-1.4. Only a  
 68 few impurities have gray scale over than 1.4. According to the brine compositions and the gray  
 69 scale ratio, we deduced the main compositions of impurities in crystal carnallite were KCl,  
 70 and little CaSO<sub>4</sub>.

71 The phase structure of carnallite and impurity particles were characterized by XRD, using a  
 72 Rigaku D/max 2550VB/PC diffractometer with Cu K $\alpha$  ( $\lambda = 0.154$  nm) radiation as the incident beam.  
 73 The diffraction peaks match well with the standard values of carnallite (JCPDS NO. 24-0869),  
 74 halite (JCPDS NO. 05-0628) and sylvite (JCPDS NO. 41-1476)

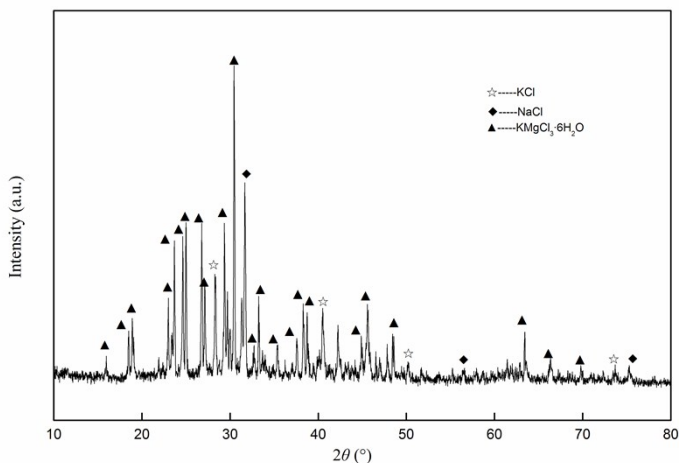

75

76

**Fig.S4 XRD Pattern**

77 The components of carnallite were analyzed by EDS (FALCON, voltage of 15 kV). The EDS  
 78 survey spectra of the specimen indicated that the crystal main chemical composition was oxygen,  
 79 chlorine, magnesium, potassium and sodium. The results obtained from EDS echo well to the  
 80 conclusion we drawn by analyzing MCT data.

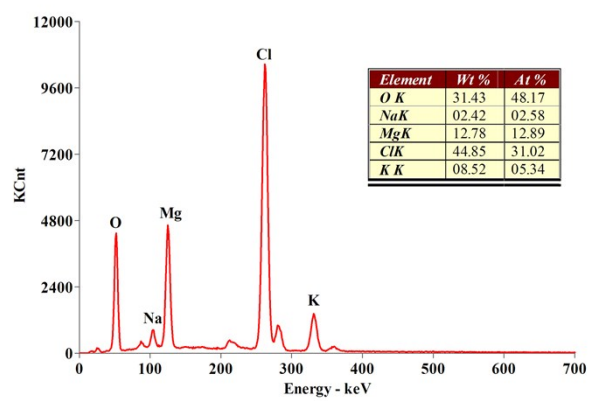

81

82

**Fig.S5 EDS Pattern**

83
